## RESEARCH ARTICLE

# Carpenter ants use diverse antennae sampling strategies to track odor trails

Ryan W. Draft<sup>1,2,\*</sup>, Matthew R. McGill<sup>3,\*</sup>, Vikrant Kapoor<sup>1,2</sup> and Venkatesh N. Murthy<sup>1,2</sup>

## ABSTRACT

Directed and meaningful animal behavior depends on the ability to sense key features in the environment. Among the different environmental signals, olfactory cues are critically important for foraging, navigation and social communication in many species, including ants. Ants use their two antennae to explore the olfactory world, but how they do so remains largely unknown. In this study, we used high-resolution videography to characterize the antennae dynamics of carpenter ants (*Camponotus pennsylvanicus*). Antennae are highly active during both odor tracking and exploratory behavior. When tracking, ants used several distinct behavioral strategies with stereotyped antennae sampling patterns (which we call 'sinusoidal', 'probing' and 'trail following'). In all behaviors, left and right antennae movements were anti-correlated, and tracking ants exhibited biases in the use of left versus right antenna to sample the odor trail. These results suggest non-redundant roles for the two antennae. In one of the behavioral modules (trail following), ants used both antennae to detect trail edges and direct subsequent turns, suggesting a specialized form of tropotaxis. Lastly, removal of an antenna resulted not only in less accurate tracking but also in changes in the sampling pattern of the remaining antenna. Our quantitative characterization of odor trail tracking lays a foundation to build better models of olfactory sensory processing and sensorimotor behavior in terrestrial insects.

**KEY WORDS:** Navigation, *Camponotus*, Olfaction, Behavior, Trail tracking, Pheromone

## INTRODUCTION

Ants exhibit remarkably sophisticated and diverse mechanisms of navigation that make use of both internal and external cues (Knaden and Graham, 2016). Sensory signals for navigation come through many modalities, including sight (Narendra et al., 2017; Graham and Philippides, 2017), touch (Klotz and Reid, 1991; Seidl and Wehner, 2006) and smell (Steck, 2012). Olfaction, in particular, is crucial for the survival and organization of the colony. Ants have highly developed olfactory systems, which they use to communicate with and recognize their colony-mates (Hölldobler and Wilson, 1990; Greene and Gordon, 2003) as well as to locate food sources and their nest (Steck et al., 2011). Ants use species-specific pheromones to create extensive networks of trails that play many

roles in colony life, including recruitment of nestmates to active food sources (Traniello, 1977; Hölldobler and Wilson, 1990; Morgan, 2009; Czaczkes et al., 2015). Studies have shown how such trails are generated and adapted over time (Reid et al., 2010; Czaczkes and Heinze, 2015; Fonio et al., 2016), and even how they can encode polarity towards or away from the nest site (Jackson, 2004). However, we know very little about how ants are able to accurately track these trails.

Previous studies involving crossing or amputation of antennae have suggested that ants use bilateral odor comparisons (tropotaxis) to follow trails (Hangartner, 1967; Schone and Strausfeld, 1984). Theoretical tropotaxis models predict that ants turn towards the antenna with the higher odor concentration while following a trail (Calenbuhr and Deneubourg, 1992). A more recent study looking at ant behavior at a trail bifurcation point has shown that the angle of turning is proportional to the difference in the total quantity of estimated odor on either side of the bifurcation (Perna et al., 2012). This suggests that ants can discriminate small differences in sensory input to the two antennae and these differences influence motor output. Despite the evidence of bilateral antennae comparisons, little attention has been given to the actual behavioral strategies and the patterns of antennae movements used to actively sample physical space during tracking.

To address this gap in knowledge, we designed a behavioral assay that used high spatial and temporal resolution videography to quantify how ants use their antennae while tracking odor trails. We used the black carpenter ant, *Camponotus pennsylvanicus* (De Geer 1773), which is widely available and easy to maintain in the laboratory, and which exhibits robust, innate trail-tracking behavior. We found that tracking behaviors are much more complex and diverse than previously described. Moreover, antennae usage revealed many interesting properties of insect behavior including stereotyped motor patterns, differences in left–right usage and behavioral plasticity after amputation. Thus, scent-tracking behavior in ants represents a rich model for understanding sensorimotor transformations and for quantitative biology in general.

## MATERIALS AND METHODS

### Animals

Several colony fragments (~50–100 individuals without a queen) were collected in the Middlesex Fells Reservation in Medford, MA, USA, during spring and summer months. Individual colony fragments were maintained separately in 17×12×7.8 inch (Hefty High Rise) plastic containers with sides coated with Fluon (BioQuip, Rancho Dominguez, CA, USA). Containers were lined with leaf-litter and small pieces of dead wood from the collection site. A glass test tube (150×25 mm, VWR) was humidified by adding ~10 ml of water and plugged with cotton balls. This tube was placed in the container as a nest area and covered in aluminium foil to block out light. Ants were given fresh water and food (Bhatkar and Whitcomb, 1970) twice per week and kept at constant

<sup>1</sup>Center for Brain Science, Harvard University, Cambridge, MA 02138, USA.

<sup>2</sup>Department of Molecular & Cellular Biology, Harvard University, Cambridge, MA 02138, USA. <sup>3</sup>Program in Neuroscience, Harvard Medical School, Boston, MA 02115, USA.

\*These authors contributed equally to this work.

\*Author for correspondence (draft@fas.harvard.edu)

© R.W.D., 0000-0001-8198-1469; V.N.M., 0000-0003-2443-4252

temperature (23°C, 20% humidity) on a 12 h light:dark cycle (Sylvania Gro-Lux 20 W, 24 inch lights).

### Trail pheromone

Ants were first anesthetized by placing them in the −20°C freezer for 5 min. Ant gasters were surgically removed with a razor blade; 250 mg of gasters were put into 0.5 ml 70% ethanol and crushed vigorously with a blunt metal rod. The resulting extract was filtered through a 0.45 µm pore filter (VWR sterile syringe filter). Blue fountain pen ink was added (10 µl) for visibility. Ink alone in ethanol did not elicit a tracking response in ants. This liquid was stored at 4°C and kept for several months.

### Behavioral arena and data acquisition

A circular platform (1 m diameter) with 150 mm plastic walls (coated with Fluon) was used as an arena for imaging trail-tracking behavior. An enclosure measuring 1 m<sup>3</sup> was built around the platform to block light and air currents. Three IR light sources (Phenax, 48 LED array 850 nm) were used to illuminate the imaging area. A camera was mounted at the top of the box (DMK 23UM021, 1280×960 pixels, The Imaging Source) to image a 28×21 cm area at 0.22 mm per pixel. The bottom of the arena was lined with fresh butcher block paper (Boardwalk, 36 inches×72 feet) before each imaging session. A piece of letter-sized index paper (Limited Papers, 110 lb stock) was taped onto the butcher paper below the field of view of the camera. On this paper, a light pencil trace of the trail (15 cm long) was drawn. Next, the trail pheromone was laid down by evenly pipetting the trail extract along the pre-drawn pencil trace with a 10 µl pipet.

An ant was captured at random from a colony and put into a small acrylic box (15×13×6 cm). This box was then placed in the imaging arena on top of the stock paper. The box had a small opening (2×0.5 cm) on one side, which was positioned at the start of the trail. As the ant explored the box, it would find the opening and encounter the trail (this would take 1–2 min). This step was necessary to calm and direct the ant, so that it did not immediately run away from the release site and fail to encounter the start of the trail.

Images were acquired at 60 frames s<sup>−1</sup> using IC Capture 2.3 (The Imaging Source) and videos were processed using ImageJ (Schneider et al., 2012). Videos were down sampled to 30 frames s<sup>−1</sup> for analysis. We stopped recording after the ant tracked the entire trail or abandoned the trail completely. Each ant was given one trial and then returned to the colony. Each trail was used to run multiple ants for up to 1 h.

### Data analysis

All analysis was carried out in MATLAB (MathWorks, Inc.).

### Extracting the trail coordinates

To extract trail coordinates, pictures of the trails were taken under visible light before any ants were introduced to the trails. From this image, pixels were classified as part of the trail using an adaptive threshold function in MATLAB. A uniform odor concentration was assumed across all pixels classified as part of the trail.

### Ant parameters

For each video, a custom-written MATLAB script was used to quantify specific parameters describing the ant in each frame, including the center of mass, the center of the head, the *XY* positions of the tips of the left and right antennae (absolute and relative to the center of the head), and the body angle of the ant (Movie 1). From these variables, speed, turning angle and trail overlap of each antenna were derived. Software can be found at: <https://github.com/rwdraft/AnTipMarker>.

For future studies, we intend to use a fully automated markerless tracking method based on deep neural networks (Mathis et al., 2018).

### Antennae position distributions

Heat maps were generated by plotting antennae tip position relative to the head position in each frame. To pool data across differently sized ants, data were normalized by antenna length in both *X* and *Y* directions. Antenna length in each dimension was taken to be the farthest *X* and *Y* distance, respectively, from the head to the antenna tip over the entire run for each ant. Normalized relative position was displayed as a 2D distribution over 50 bins in both *X* and *Y* directions.

### Behavioral module categorization

From the tracking videos, three distinct patterns of behavior ('probing', 'sinusoidal' and 'trail following') were identified through observations of video recordings. An algorithm was created that used speed and the distance from the head to the trail to segment videos into these different behaviors that match manual annotations made by several researchers (Fig. S1). First, if an ant's speed was less than or equal to 2 pixels per frame (13.2 mm s<sup>−1</sup>) for five consecutive frames, the ant was said to be stationary and these times were marked as probing. Second, sinusoidal movement was identified by examining the distance of an ant's head to the trail over time. To ensure this distance scaled with body size, which varies among ants, a relative measure was used as a base unit: a 'segment' is the distance from the center of the ant's head to its centroid (~4.0 mm). The presence of any prominent and distinct peaks in the distance between the ant head and the trail over time was noted (i.e. peaks greater than one-sixth of a segment and not closer than two-thirds of a segment to each other). To characterize the behavior as sinusoidal, there had to be at least two marked peaks within 1 s of each other (i.e. periodic movement about the trail). Third, trail following was identified as times when the distance from the ant's head to the trail was less than one-third of a segment for at least five frames. Additionally, 'off-trail' behavior was identified as times when the distance from an ant's head to the trail was greater than two-thirds of a segment, and any unmarked frames were characterized as 'other' behavior.

### Trail overlap and estimated odor

A rough estimate of the odor concentration sensed by the antenna was obtained by assuming (1) the antennae are held close to the surface (i.e. ignoring *Z*-dimensional information), (2) the antenna's ability to detect trail odor is approximately a step function of distance, (3) the trail pheromone concentration is uniform among pixels labeled as being part of the trail, and (4) the majority of odorant receptors are at the tip of the antenna (Nakanishi et al., 2009). A circle of 10.5 pixel diameter centered on the antenna tip was drawn. The number of trail pixels within this circle is the measure of 'trail overlap' or estimated odor concentration (Movie 2). To explore how the width of the step function (the circle) affected our estimation, this trail overlap was plotted as a function of diameter of the circle. Empirically, a circle of diameter 10.5 pixels (2.3 mm) preserved the most information without saturation or redundancy (Fig. S2) and was used for all analyses. For reference, the trail width was approximately 10 pixels (2.0 mm).

### Direction of antenna movement

A vector was calculated for the movement of the antenna tip between frames. To prevent alignment imperfections from contributing to the data, data points were discarded if the

Euclidean distance of the movement between frames was less than 4 pixels (0.88 mm). A histogram of the movement angles for each antenna was plotted. The angles from the right antenna were flipped horizontally to match the perspective of the left antennae so data from each behavioral module could be pooled into a single plot.

### Angle of antenna joint

To quantify the angle between the flagellar segment and the scape of the antenna, the position of the bend between these two segments was marked manually for both tracking and freely exploring ants. Two lines were drawn between the three marker points: (1) between the antenna tip and the joint and (2) between the joint and the head point. The angle between the two lines was calculated for each frame for both antennae.

### Odor peak height and width

To quantify how the antennae interact with the trail during probing and trail-following behavior, the duration an antenna tip stayed on the trail once it made contact was measured as well as the maximum trail overlap it had during contact. This was done in two different ways, which gave similar results. In the first method, the 'findpeaks' function in MATLAB was used on the trail overlap data. Any peaks closer than 10 frames to each other were discarded, and the width of each peak was measured at the half-height of the peak. This method removes data from nearby peaks and therefore may underrepresent the duration of continuous encounters with the trail. In the second method, a modified 'findpeaks' function was used. The extent of all peaks at the half-height was recorded. Peaks with overlapping extents were considered a single peak and the highest peak value was taken as the true peak height. The longest extent was taken as the true peak width.

### Linear regression

For trail following, a linear regression was performed on the change in an ant's body angle using the distance of each antenna tip from the trail as a predictor. Distance was used instead of our estimated odor measurement because distance is a more continuous variable. Data from frames where both antennae tips were far from the trail (i.e. both had 0 values of trail overlap) were removed. The body angle change at different time points was regressed with respect to antennae tip position (0–8 frames ahead in time; data not shown) to identify any lag between behavioral output and odor input. The highest coefficient of determination (adjusted  $R^2$ ) value was found by pairing body angle data from 4 frames after tip position data. In no case did ant speed improve the model as a predictor of body angle change, so it was not included in our final regression. In Fig. S4A, this change in body angle was cross-correlated with the change in the angle of the antenna relative to the head. The antenna angle was calculated by taking a line from the center of the head to the tip of an antenna and finding the angle between this line and the body axis. A negative change in antenna angle is a movement towards the body axis and vice versa.

### Antennae correlation

The distances from the left and right antennae tips to the trail (or to the midline) were correlated during 'bouts', or sequences of frames for a single behavior of at least 30 frames (1 s). To determine significance, correlation values were first converted using Fisher's Z-transformation.

### Left-right antenna bias

To model the expected difference in the left and right antennae trail overlap, two methods were used. In the first, the trail overlap values

(right and left) for a given ant were pooled. Then, half of these values were randomly assigned to one antenna and the remainder to the other antenna, and then a bias measure was calculated: (sum of left values–sum of right values)/sum of all values. This was repeated 100,000 times to generate a bootstrap distribution. Only ants with more than 200 frames of data were included in the analysis.

The second method took into account the total number of peaks in the trail overlap data, which was obtained using the modified 'findpeaks' function described above (see 'Odor peak height and width'). The total trail overlap values (right and left) for a given ant were summed and this number was divided evenly into the number of peaks present in the observed data. Each peak was then randomly assigned to either the left or right antenna and a bias measure was calculated as described above. This was repeated 100,000 times to generate a bootstrap distribution. Only ants with more than 200 frames of data were included in the analysis.

### Antenna removal and turn analysis

For antenna removal experiments, ants were captured from a colony and anesthetized by placing them on a bed of ice (covered by a wet paper towel) until they were immobile. Under a stereomicroscope, one antenna was clipped off at the base of the head using sterile scissors. These ants were then marked for easy identification by applying a spot of nail polish to the abdomen with a toothpick. These ants were tested in the behavioral arena between 2 and 72 h after surgery.

Larger (and inherently longer duration) turns were identified by finding peaks of greater than 15 deg prominence in the body angle data over time for each ant (using the 'findpeaks' function in MATLAB).

## RESULTS

In this study, we focused our analysis primarily on straight-line trails where all sensory information apart from olfactory cues from the trail (visual and tactile cues) were minimized.

### Antennae sample a wider area of space during trail tracking

To study the differences in antennae usage during trail tracking, we compared the antennae positions (relative to the head) for ants introduced to an odorant trail ('trail tracking'; Movie 1) with those of ants not given a trail and allowed to run freely in the behavioral arena ('exploratory behavior'). We examined relative positions to focus on antennae sampling independent of head movements. We focused on the antennae tips (Fig. 1A), because this is the region of the antennae where odorant receptors are most highly concentrated (Nakanishi et al., 2009). When tracking odor cues, ants use their antennae to sample a large, arc-like region of space around the midline (where the trail is typically located) (Fig. 1B; Movie 2). During exploratory behavior, the antennae tips are held within a smaller area located away from the ant's midline. Although the mean speed of the ant centroid was significantly lower during trail tracking relative to the exploratory behavior (Fig. 1C, left), the mean speed of antennae tip movement (relative to the head) was statistically equivalent (Fig. 1C, right). Therefore, small antennae movements occur with similar speeds in the two conditions, which shows that ants move their antennae actively whether or not they are tracking an odor trail. However, while tracking, the small movements range over a much wider space including the area directly in front of the ant.

### Ants exhibit several distinct behavioral strategies during trail tracking

While tracking, ants exhibit substantial differences in their body movements and apparent behavioral states (Fig. 2). Ants moved

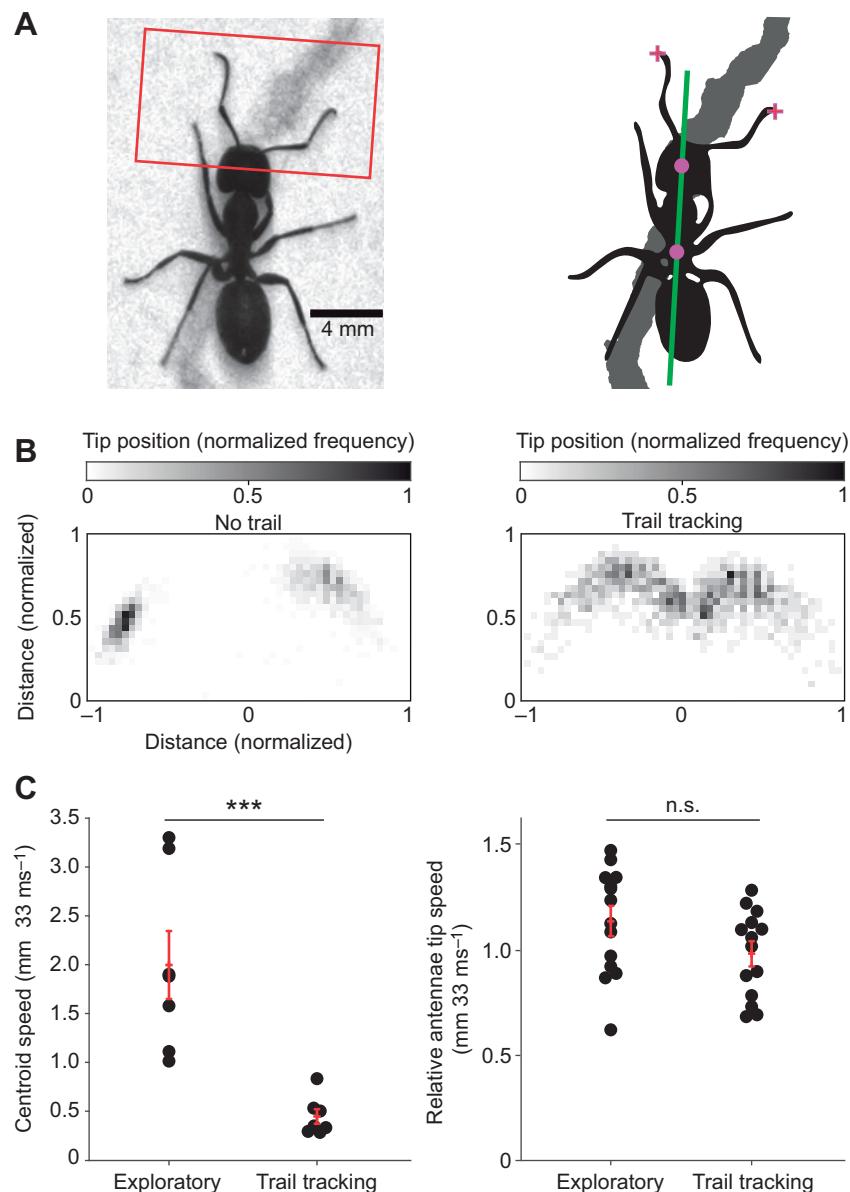

**Fig. 1. Antennae sample a larger area during trail-tracking behavior.** (A) Left: high-resolution image of an ant tracking an odor trail. The red box roughly shows the area over which the antennae tip positions were quantified. Right: a schematic drawing of the same ant showing parameters used for analysis: antennae tip positions (crosses), head and ant centroids (dots), body axis (green line) and trail pixels above threshold (gray). (B) Normalized relative antennae tip positions from a single ant (1262 data points) without an odor trail (left, 'exploratory behavior') versus a single ant (1262 data points) following an odor trail (right, 'trail tracking'). (C) A comparison of the mean instantaneous speed of the centroid (left) and antennae tips relative to the head (right) during exploratory behavior and trail tracking (exploratory behavior:  $n=7$  ants; trail tracking:  $n=7$  ants). Trail-tracking ants are significantly slower (Wilcoxon rank-sum, two-tailed,  $P<0.001$ ), but no significant difference was found in relative antenna tip speed between the two conditions (Wilcoxon rank-sum, two-tailed,  $P=0.323$ ). Mean and s.e.m. (red) for each distribution are shown. \*\*\* $P<0.001$ ; n.s., not significant.

in sinusoidal paths centered near the trail (sinusoidal behavior), moved at very slow speeds along the trail (probing behavior) or followed the trail very closely and accurately (trail-following behavior). All ant trials included one or more of these three behavioral modules (Fig. S3A,B), which were codified using empirically derived parameters (see Materials and Methods). We marked when ants were far from the trail ('off trail') and when ants exhibited behaviors that did not conform to the above categorizations ('other behavior'). The presence of these easily observable and classifiable behavioral states among a population of ants demonstrates that trail tracking involves multiple strategies and is not a homogeneous behavior.

#### Distinct antennae sampling and movement patterns in different behavioral modules

We examined the antennae tip positions (relative to the head) separately for each behavioral module and found robust differences in sampling space (Fig. 3A). Antennae tips were close to each other and close to the head during probing behavior. In contrast, during exploratory and sinusoidal behaviors, the antennae were farther

away both from the head and from each other. In trail following, the antennae spacing was intermediate relative to other behaviors, and antennae were largely excluded from an area at the midline approximately the width of the trail ( $\sim 2.0$  mm). To quantify these differences, we examined the distance of an antenna tip to the head ( $\rho$ ) and the angle of the antenna relative to the ant's body axis ( $\theta$ ) (Fig. 3B). Antennae tips were closer to the head and had more acute angles relative to the body axis for probing than for other behavioral modules (Fig. 3C). Trail following had intermediate values of these parameters, and sinusoidal and exploratory behaviors had the largest values. For both  $\rho$  and  $\theta$  values, all differences were significant except for the comparison between sinusoidal and exploratory behaviors.

There is currently no method to measure the actual concentrations of specific chemicals sampled by the antennae. Therefore, to relate the differences in the sampling space to odor sensation, we measured the extent of overlap between a 10.5 pixel diameter circle centered on an antenna tip with the trail (Fig. 3D). Even though the ant was very close to the trail in both probing and trail following, sampling during probing resulted in greater antennae overlap with



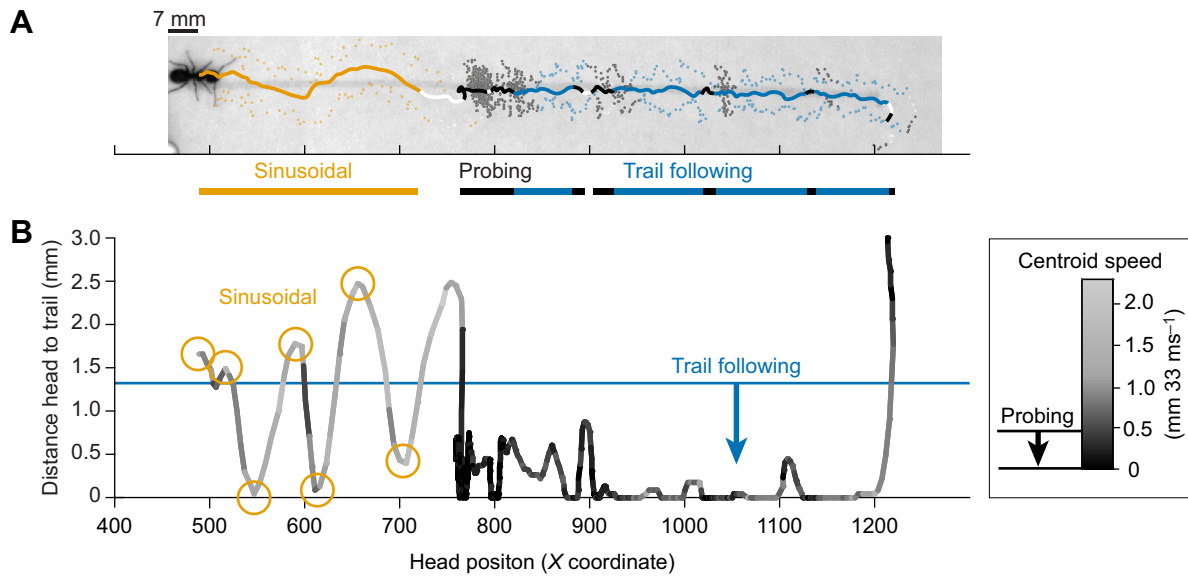

**Fig. 2. Trail-tracking behavior can be separated into three behavioral modules.** (A) Antennae tip and head positions plotted on an image of the ant and the odor trail. Points are colored according to the behavioral module of the ant in each frame: orange: sinusoidal; black: probing; blue: trail following; white: other. Bars below the plot show consolidated blocks of the three tracking behavioral modules (sinusoidal, probing and trail following). (B) A plot of the distance of the head to the trail versus the X coordinate of the image. The curve is pseudo-colored to show the speed of the ant (5-point moving average). Speeds less than 2 pixels per frame (0.44 mm per 33 ms) were used to identify probing behavior (see inset on right); clusters of large peaks in the distance values were used to identify sinusoidal behavior; distances of the head to the trail less than ~1.3 mm were used to identify trail-following behavior; distances larger than ~2.6 mm were used to identify off-trail behavior. All other frames were marked as 'other'.

the trail (Fig. 3E). Antennae overlap with the trail was greater for both probing and trail following compared with sinusoidal, where the ant was often farther than one antenna length from the trail (Fig. 3E). This shows that differences in sampling among behavioral modules are likely to result in differences in odor sensation.

To better understand the antennae movements that underlie these sampling differences, we investigated the change in position of antennae tips (relative to the head) between subsequent frames (Fig. 4A). These instantaneous movement vectors exhibited three different distributions (Fig. 4B). During probing, ants swept their

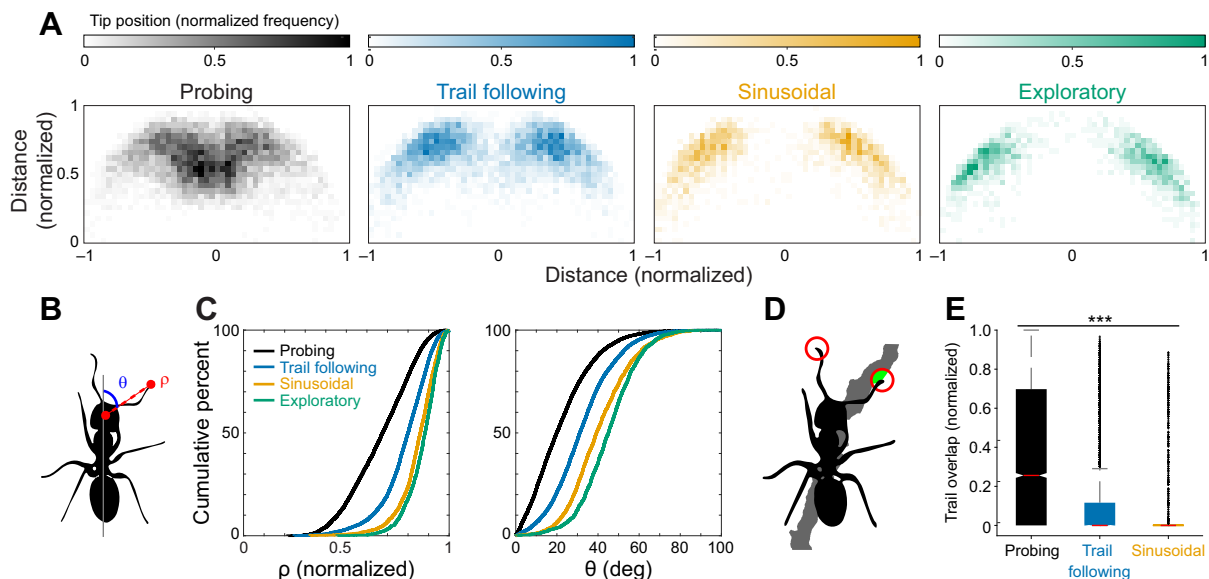

**Fig. 3. Antennae sample space and receive odor information differently in distinct behavioral modules.** (A) Relative antennae tip positions were normalized to the length of each ant's antennae (1=full antenna length). Normalized relative antennae tip positions from exploratory behavior ( $n=7$  ants, 1420 data points) and trail tracking ( $n=29$  ants) separated into behavioral modules (probing: 8158 data points, trail following: 4618 data points, and sinusoidal: 1822 data points). (B) Schematic drawing showing two variables used to quantify the distributions in A.  $p$  is the distance of the antenna to the head and  $\theta$  is the angle between the body axis and a line connecting the head and antenna tip. (C) Cumulative percent plots of  $p$  and  $\theta$  for each behavioral module. All behaviors show distinct distributions except sinusoidal and exploratory (Kolmogorov–Smirnov, two-tailed,  $P<0.0001$  and  $P>0.06$ , respectively, Bonferroni corrected,  $\alpha=0.008$ ). (D) Trail overlap (green) was quantified between a 10.5 pixel diameter circle centered on the antenna tip and the trail pixels. Values were normalized to the maximum possible overlap (89 pixels). (E) Trail overlap during the three behavioral modules ( $n=29$  ants). Overlap was highest during probing, followed by trail following, then sinusoidal behavior (Wilcoxon rank-sum, two-tailed,  $P<0.0001$ , Bonferroni corrected,  $\alpha=0.008$ ). \*\*\* $P<0.001$ .

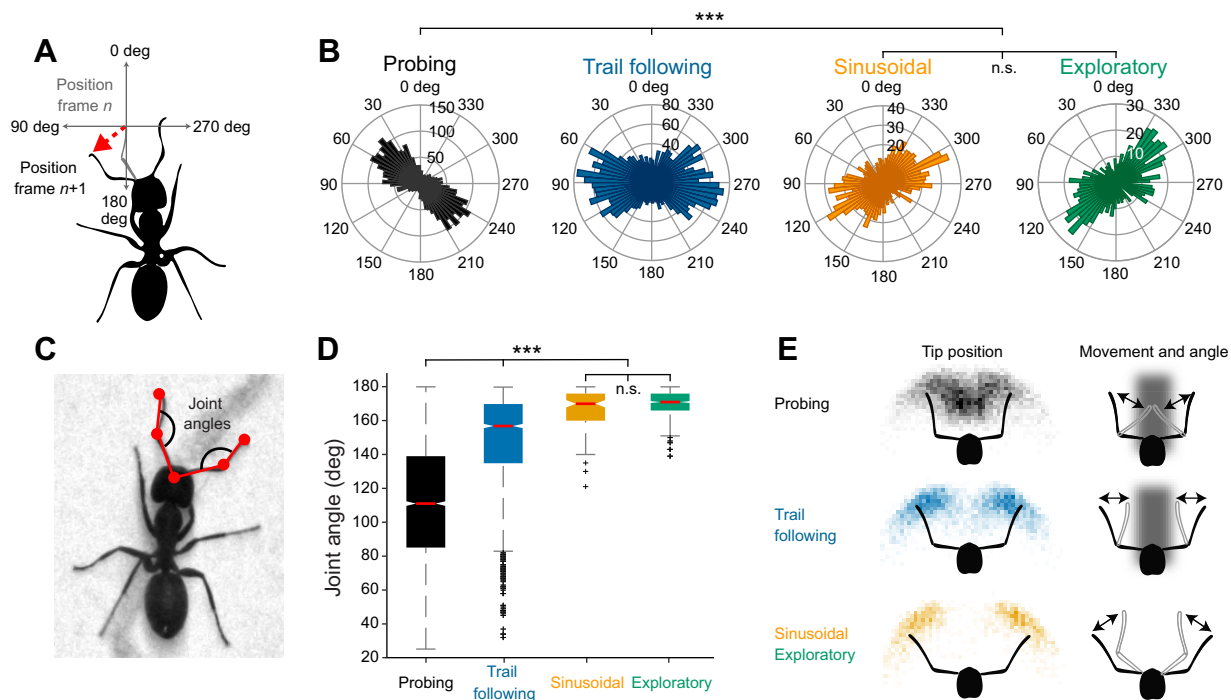

**Fig. 4. Pattern of antennae movement and joint angles differ during behavioral modules.** (A) Schematic drawing showing the instantaneous angle of movement of the relative antenna tip positions between frames. (B) Angle histograms of instantaneous movement angles for each of the behavioral modules ( $n=29$  trail tracking;  $n=7$  exploratory; probing: 3514 data points, trail following: 2998 data points, sinusoidal: 1161 data points, exploratory: 851 data points). All behaviors show distinct distributions of relative antennae movements except for the comparison of sinusoidal and exploratory behaviors (Kolmogorov–Smirnov, two-tailed,  $P<0.0001$  and  $P=0.224$ , respectively, Bonferroni corrected,  $\alpha=0.008$ ). (C) Schematic drawing showing the points marking the head, pedicel and antenna tip. Two lines between these three points were used to calculate the angle between the flagellar segment and the scape for both the left and right antennae. (D) Joint angles during the trail-tracking behavioral modules ( $n=7$  ants; probing: 4030 data points, trail following: 1922 data points, sinusoidal: 138 data points) and exploratory behavior ( $n=4$  ants; 814 data points). All behavioral modules show distinct antennae joint angle distributions except for the comparison of sinusoidal and exploratory behaviors (Kolmogorov–Smirnov, two-tailed, all pairs  $P<0.0001$  except sinusoidal and exploratory:  $P=0.009$ , Bonferroni corrected,  $\alpha=0.008$ ). (E) Summary of the movement angles, joint angles and tip positions in each behavioral module. \*\*\* $P<0.001$ ; n.s., not significant.

antennae along a roughly 45 deg diagonal towards and away from the head. In exploratory and sinusoidal behaviors, antennae movements occurred along a roughly 120 deg diagonal that was approximately perpendicular to the movement patterns during probing. During trail following, the antennae moved in a direction perpendicular to the ant's body axis. Investigation of the sequence of antennae movement vectors confirmed that the antennae tips moved back and forth between the two peaks shown in the polar histograms across the different behavioral modules (Fig. S4B).

The antennae contain an elbow-like joint between the scape and the flagellum, which changes its angle to help control the position of the antenna tip (Fig. 4C). We measured the distribution of joint angles in each of the behavioral modules to fully describe the movement of the antennae. Again, we saw three broad groups (Fig. 4D). Probing displayed the widest range of angles (interquartile range: 139–85 deg), indicating swinging of the flagellar segment inwards and outwards from the head. Exploratory and sinusoidal behaviors have the smallest range of joint angles, concentrated at the largest angles (interquartile range: 176–160 deg), indicating a rigid, outstretched antenna. Intermediate values of antennae angles were observed during trail following (interquartile range: 170–135 deg). Taken together, these data suggest a model of how the antennae move during these different behavioral modules, which is summarized in Fig. 4E. These findings show that behavioral modules classified with body movement parameters are associated with different strategies for antennae usage.

#### During trail following, ants use bilateral information to turn towards odor signals

To study the bilateral use of antennae during tracking and to better understand how antenna signals affect the body position, we focused on the trail-following behavioral module, when the ant tracks the trail closely and accurately. During trail following, the ant largely maintains the odor trail between its two antennae, as seen on the representative plot of antennae tip positions over time (Fig. 5A). To quantify the duration and degree of antennal tip contact with the trail, we measured the peaks and widths of trail overlap and compared them with those during probing (Fig. 5B). As shown, the trail-following odor peak widths, which represent the amount of time an antenna tip spent on the trail, were much shorter than those during probing (Fig. 5C). The peak heights, which represent the maximal extent of overlap between the trail and an antenna tip, were also higher during probing (Fig. 5D). The smaller and shorter peaks in trail overlap during trail following are consistent with the idea that the ants are briefly bringing their antennae to the edge of the trail and then moving them away.

We created a linear model to examine the relationship between odor sensation and changes in ant movement. Specifically, this model relates the antennae tip positions during trail following and the body angle change 4 frames later. This amount of delay (133 ms) was found to yield the best fit based on the adjusted  $R^2$  value. In this regression, the explanatory variables are the distances from the two antenna tips to the trail separately, excluding frames where both antenna tips have zero overlap with the trail (i.e. zero estimated odor concentration). Under these conditions, we obtained the relationship:

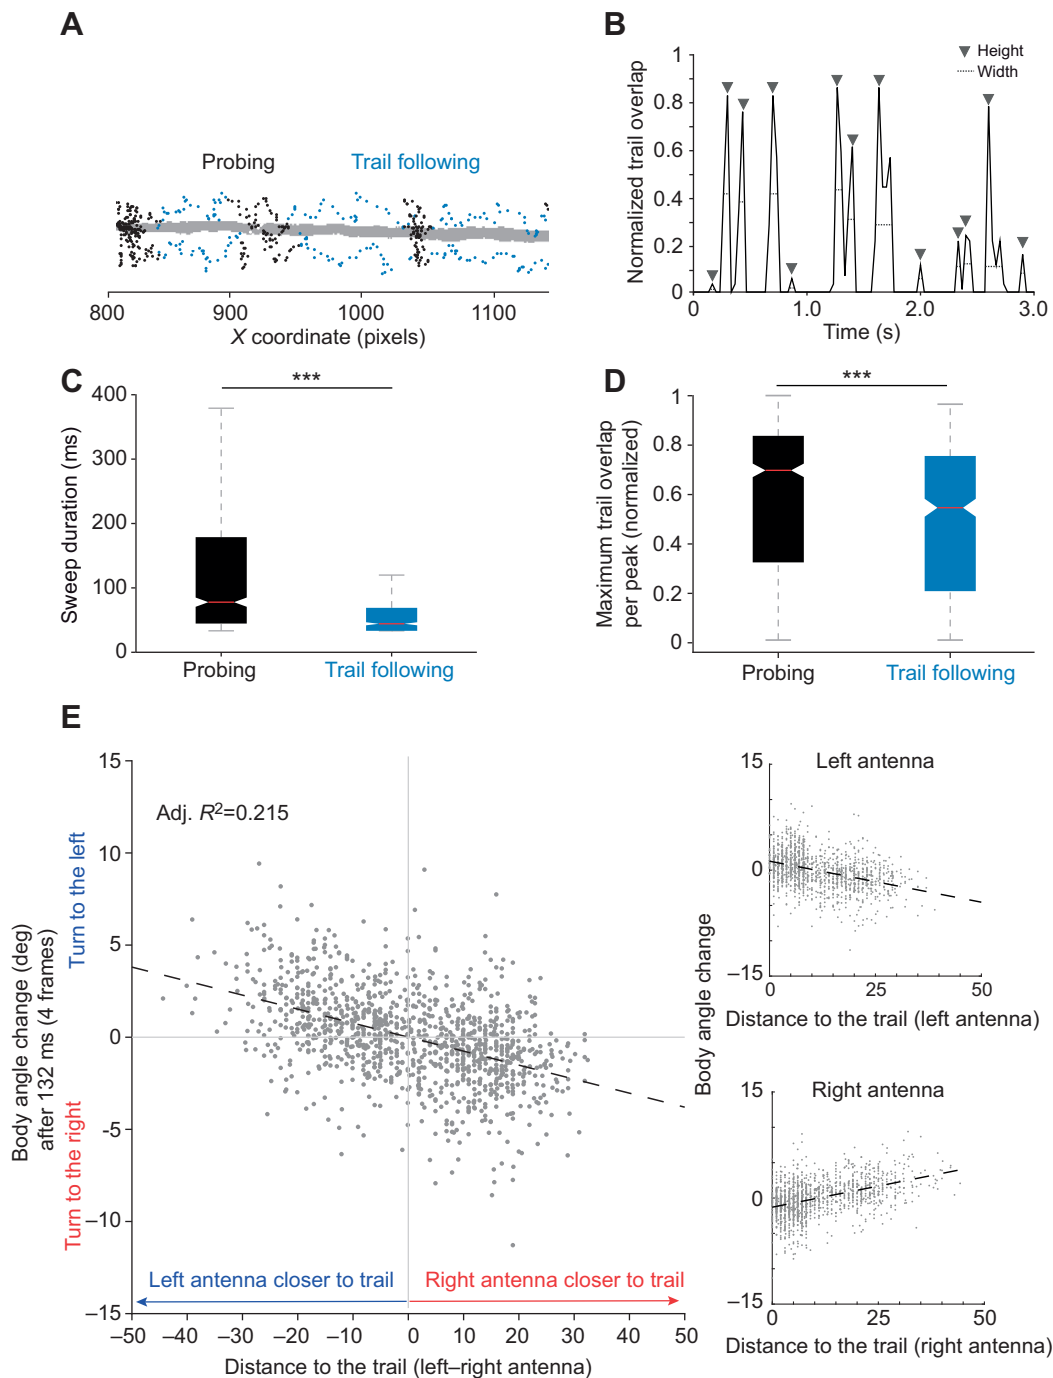

**Fig. 5. During trail following, ants track by turning towards small increases in odor concentration.** (A) Overlay of antennae tip positions during probing (black) and trail following (light blue) with respect to the trail (gray) for a single ant trial. (B) Normalized trail overlap for a single antenna over time showing peaks with widths and heights that reflect the extent of antenna tip overlap with the trail in time and space, respectively. Peak heights and widths of distinct encounters with the trail were marked computationally (gray triangles and dashed lines, respectively); see Materials and Methods for details. (C) Quantification of peak widths for probing and trail following ( $n=29$  ants; probing: 863 peaks, trail following: 561 peaks). Peak widths in trail overlap were higher during probing (median difference of 33.6 ms, Wilcoxon rank-sum, one-tailed,  $P<0.0001$ ). Outlier values were omitted from the probing data plot to facilitate the comparison. (D) Quantification of peak heights for probing and trail following ( $n=29$  ants; probing: 863 peaks, trail following: 561 peaks). Peak heights were larger during probing (median difference of 0.15, Wilcoxon rank-sum, one-tailed,  $P<0.0001$ ). (E) Linear regression on trail-following behavior (1408 data points) showing the effect of antennae tip distance to the trail (left minus right) on turning angle (after 4 frames). When the left antenna is much closer to the trail, ants turn to the left and vice versa (adjusted  $R^2=0.215$ ,  $F$ -test,  $P<0.0001$ ). Insets show the individual relationships between each antenna and turning angle (after 4 frames) ( $r=-0.39$  and  $r=0.44$  for the left and right antenna, respectively). \*\*\* $P<0.001$ .

Angle change =  $-0.27 + (0.086 \times \text{Right distance}) - (0.060 \times \text{Left distance})$ , where both independent variables were necessary and the model was significant. When plotting the differences between the left and right antennae tip distances, we found that the largest changes in

angle occurred when bilateral signaling was heavily biased towards one antenna. Based on the way we have defined the body angle, a positive change corresponds to a turn to the left. Thus, when the left antenna comes closer to the trail, the ant turns to the left, and a

complementary relationship holds for the right antenna (Fig. 5E). This would result in a movement that keeps the trail centered between antennae.

### Ants show a difference in right/left antennae usage

The above data indicate that the two antennae are frequently at different distances from the odor trail, presumably conveying distinct odor concentrations. To determine whether the movements of the two antennae were coordinated, we calculated a correlation value between the distances of the two antennae from the trail for probing and trail following, the only behavioral modules where the ant is close to the trail. Antennae positions were significantly anti-correlated in both behaviors (Fig. 6A,B). The same result also holds

when using the trail overlap variable instead of the distances of the antennae to the trail (Movie 2, Fig. S5). Furthermore, correlations between the left and right antennae distances to the trail at different frame lags revealed a periodic relationship between the two antennae (Fig. S5). This result reflects the periodic nature of the raw distance time series (Fig. 6A), which resembles two sine waves with different phases. To evaluate whether this anti-correlation exists in other behavioral modules, we repeated this analysis for distances of the two antennae from the body axis of the ant. Antennae tip positions relative to body axis were significantly anti-correlated during all behavioral modules except trail following (Fig. 6B). Trail following showed much lower anti-correlation values when using antennae tip to body axis distances compared

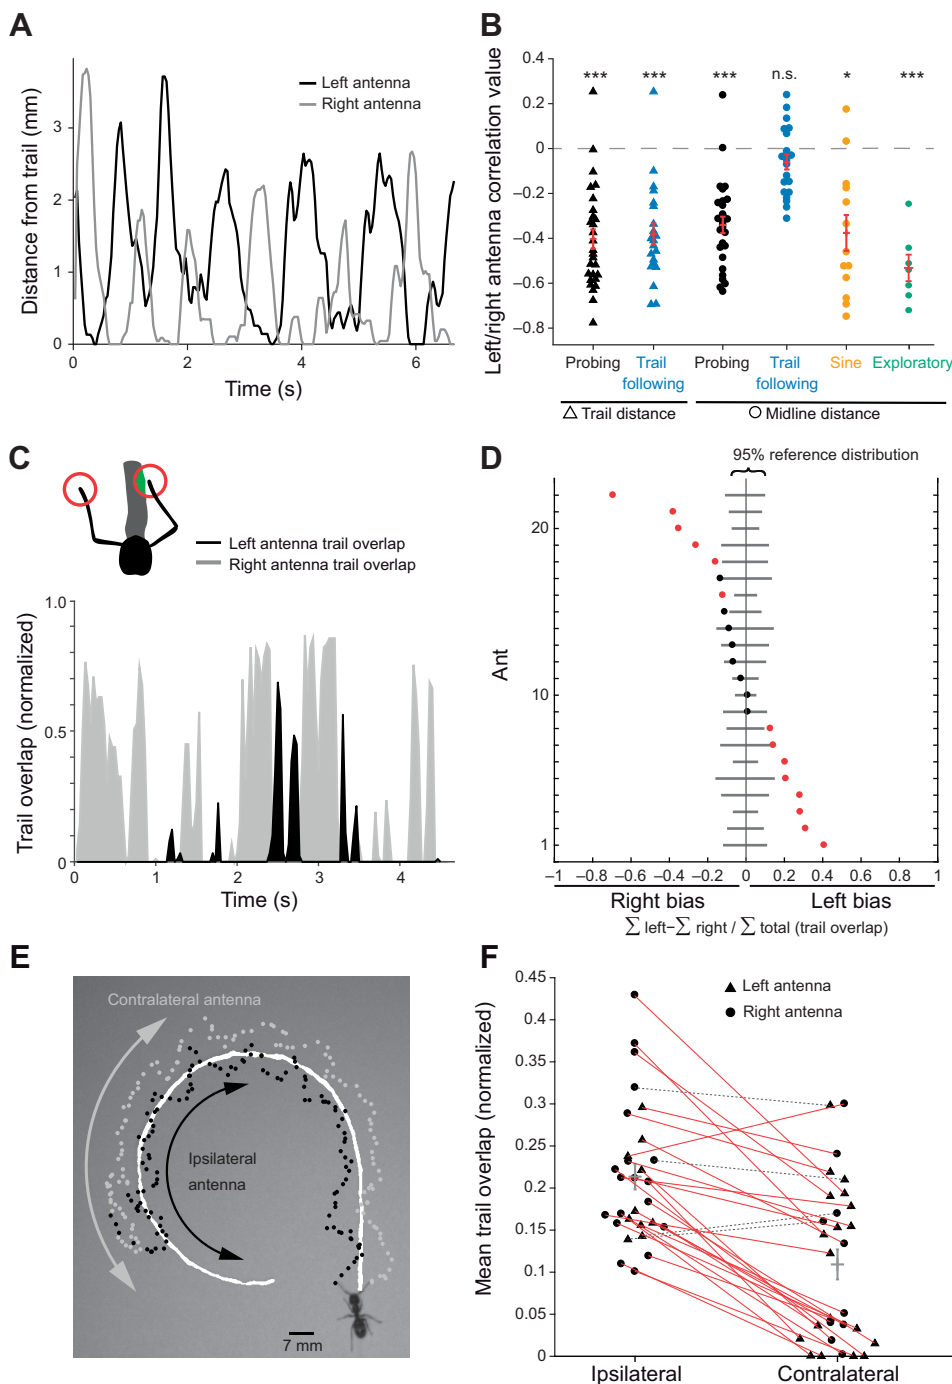

**Fig. 6. Antennae pairs show alternation and bias.** (A) Plot of right (gray) and left (black) antennae distances to the trail over time during probing behavior for a single ant. The plot shows clear alternation. (B) Correlation values for left and right antennae distance to the trail during probing and trail-following behaviors (triangles, *t*-test, two-tailed,  $P < 0.0001$ ), and distance of the antennae to the ant's body axis for all behavioral modules (circles, *t*-test, two-tailed,  $P < 0.0001$  except sinusoidal:  $P = 0.047$  and trail following:  $P = 0.0964$ ). Each point represents a behavioral 'bout' of at least 1 s (28 probing bouts, 22 trail-following bouts, 13 sinusoidal bouts, 7 exploratory bouts). Statistical significance was evaluated using a *t*-test after Fisher's Z-transformation. Mean and s.e.m. (red) for each distribution are shown. (C) Top: a diagram showing how trail overlap values were obtained. Bottom: plot of right (gray) and left (black) antennae trail overlap values over time for a single ant shows a clear bias towards the left antenna. (D) A bias index was defined as the relative difference of total trail overlap values between the left and right antenna of a single ant after tracking a straight-line trail ( $n = 22$ ). The observed bias is shown as black and red dots (not significant and significant, respectively). Solid lines show the distribution of left-right bias from a randomization of the data from each ant (100,000 iterations per ant). Fifteen ants showed a dominant antenna ( $P < 0.05$ , two-tailed, bootstrap distribution), with seven and eight ants showing a significant right and left bias, respectively. (E) Representative image plotting right (contralateral, gray) and left (ipsilateral, black) antennae tip positions of an ant tracking a curved line trail. (F) Bias of antennae ipsilateral and contralateral to the direction of left and right curved trails. Of the 29 ants tested on the 10 left-curved and 19 right-curved line trails, 25 ants showed a dominant antenna (Wilcoxon sign-rank, one-tailed,  $P < 0.05$ , red lines); 24 ants showed an ipsilateral bias and 1 showed a contralateral bias. Mean and s.e.m. (gray) for each group are shown. \* $P < 0.05$ ; \*\*\* $P < 0.001$ ; n.s., not significant.



with tip to trail distances. This suggests that, in trail following, alternating movements of the body axis shift the antennae tips towards and away from the trail (Movie 3). This is opposite to other behavioral modules, where the antennae themselves alternate about the body axis. Overall, across behavioral modules, movement of the two antennae is anti-correlated regardless of how and whether an ant is tracking an odor trail.

Additionally, we observed that one antenna within a pair often overlaps significantly more with the odor trail than would be expected by chance (i.e. random permutation of the same data, example raw data in Fig. 6C). We defined a bias index (i.e. relative difference of trail overlap values, Fig. 6D) for each ant run. The population of ants analyzed showed a continuum of bias from very strongly left biased to very strongly right biased (Fig. 6D, 8 of 22 left biased, 7 of 22 right biased). Since odor is encountered in discrete events when the antenna comes in contact with the trail, we also tested whether data were significantly different from expected if the total odor were randomly distributed in blocks equal to the number of peaks present in the trail overlap data (Fig. S6A, 9 of 22 biased). From the features of the peaks in the trail overlap data, it appears the bias arises from differences in the number of peaks, peak widths and peak heights between the left and right antenna, but each of these factors contributes differently in those ants which show a bias (Fig. S6B).

This continuum of bias, found in straight-line trail-tracking ants, was not present in ants tracking trails of various degrees of curvature (from radius 3 cm to 6 cm, example in Fig. 6E). In curved trails, the biased antennae were nearly always ipsilateral to the inner curvature of the trail (Fig. 6F, 24 of 29 ants significantly ipsilaterally biased, 1 of 29 significantly contralaterally biased). These data suggest that there are biases in left–right usage among ants, but these biases may be context dependent.

Taken together, this shows that the left and right antennae are used in a non-redundant manner during tracking and that ants take advantage of bilateral symmetry during tracking behaviors to gather information about the environment.

### Single-antenna ants show behavioral compensation through altered antenna usage

To test the importance of bilateral antennae information for tracking behavior, we removed a single antenna from ants and tested their ability to track trails (2–72 h after surgery,  $n=6$  ants, 14 trials). We compared the single antenna of these ants with the left antenna of our previously analyzed tracking ants. The single-antenna ants showed a wider distribution of relative antenna tip positions, including positions farther away from the head and closer to the midline compared with the distribution of control ants (Fig. 7A,B). Furthermore, the single antennae often extended across the midline, which was much less apparent in control ants (Fig. 7A, red pixels). To quantify this difference, we compared the percent of time when an ant's antenna crossed the midline and found single antennae crossed ~3-fold more often (Fig. 7C). This raised the question of whether these different distributions impacted trail sampling. We focused this analysis on trail following, when the ant was closely tracking the trail, and quantified the percent of time an antenna extended beyond the contralateral side of the trail (Fig. 7C). The single antennae crossed the trail ~7-fold more often. This shows that single-antenna ants adapt to amputation by changing the pattern of usage of the remaining antenna to sample a larger physical space around themselves and around the trail.

Next, we evaluated how accurately the single-antenna ants were able to follow the odor trail by plotting the distance of the head to the

trail over time. We compared the root mean square error (RMSE) of this distance and found that single-antenna ants had significantly higher RMSE (Fig. 7D,F). The side on which errors occurred was not consistently correlated with the position of the removed antenna (data not shown). Additionally, we found that ants with a single antenna made fewer small instantaneous body angle changes relative to control ants as well as a greater number of large (longer duration) turns (Fig. 7E).

Finally, we compared the trail overlap from the single antenna and control ants (Fig. 7G, left and middle boxplots). Surprisingly, we found these estimated odor distributions to be similar, suggesting that the wider sampling area of single antennae helps to compensate for larger head to trail deviation. However, as shown previously, single-antenna ants track less accurately (Fig. 7F); given that the two antennae are used non-redundantly (Fig. 6), control ants receive much more odor information over time. Therefore, we selected, from control ants, the larger of the two antennae trail overlap values at all time points as a comparison (Fig. 7G, right boxplot). Indeed, single-antenna ants showed far less overlap with the trail compared with this bilateral signal. Therefore, having two antennae allows the ant to be in contact with the trail more continuously.

### DISCUSSION

In this study, we quantified and modeled the strategies of tracking behavior and antennae usage in ants (*Camponotus pennsylvanicus*). We have shown, for the first time, that ants use a variety of behavioral strategies during trail tracking, each of which has a distinct and stereotyped pattern of antennae sampling. In all trail-tracking behaviors, we found that the left and right antennae play non-redundant roles in odor detection: they generally move in anti-correlated fashion and ants often exhibit a bias in which one antenna is closer to the odor trail. This observation suggests lateral specialization and, moreover, the use of complex strategies for odor detection. We further examined the influence of bilateral comparisons over an extended trail-tracking episode, and we found that ants show signatures of edge detection and use information from both antennae to guide turning and accurately follow the trail. Removal of one antenna impairs tracking but also results in adaptation of antenna sampling, suggesting ants can adopt motor strategies to partially compensate for antenna loss.

### Antennae show distinct patterns of movement and placement during odor tracking

Quantitative studies have led to a greater understanding of olfactory behavior in many species (e.g. Gomez-Marín et al., 2011; Riffell et al., 2014; Khan et al., 2012). Although chemical communication and trail following in ants have been studied for many decades, there is very little known about sensorimotor strategies at the level of the antenna. Ants have relatively long sensors that are highly motile. As a first step in being able to model their olfactory behavior, we looked at antennae movement during trail tracking at high spatial (0.22 mm per pixel) and temporal resolution (30 frames  $s^{-1}$ ).

We found that antennae are highly dynamic whether tracking a trail or exploring (Fig. 1C). However, during tracking, antennae sample a much larger area of space (Fig. 1B). Additionally, by measuring ant speed and body movement relative to the trail, we were able to classify behavior into three discrete components (or behavioral modules, Fig. 2) – sinusoidal, probing and trail following – similar to classifications done in other invertebrates (Green et al., 1983). These three behavioral modules showed distinct patterns of antennae sampling.

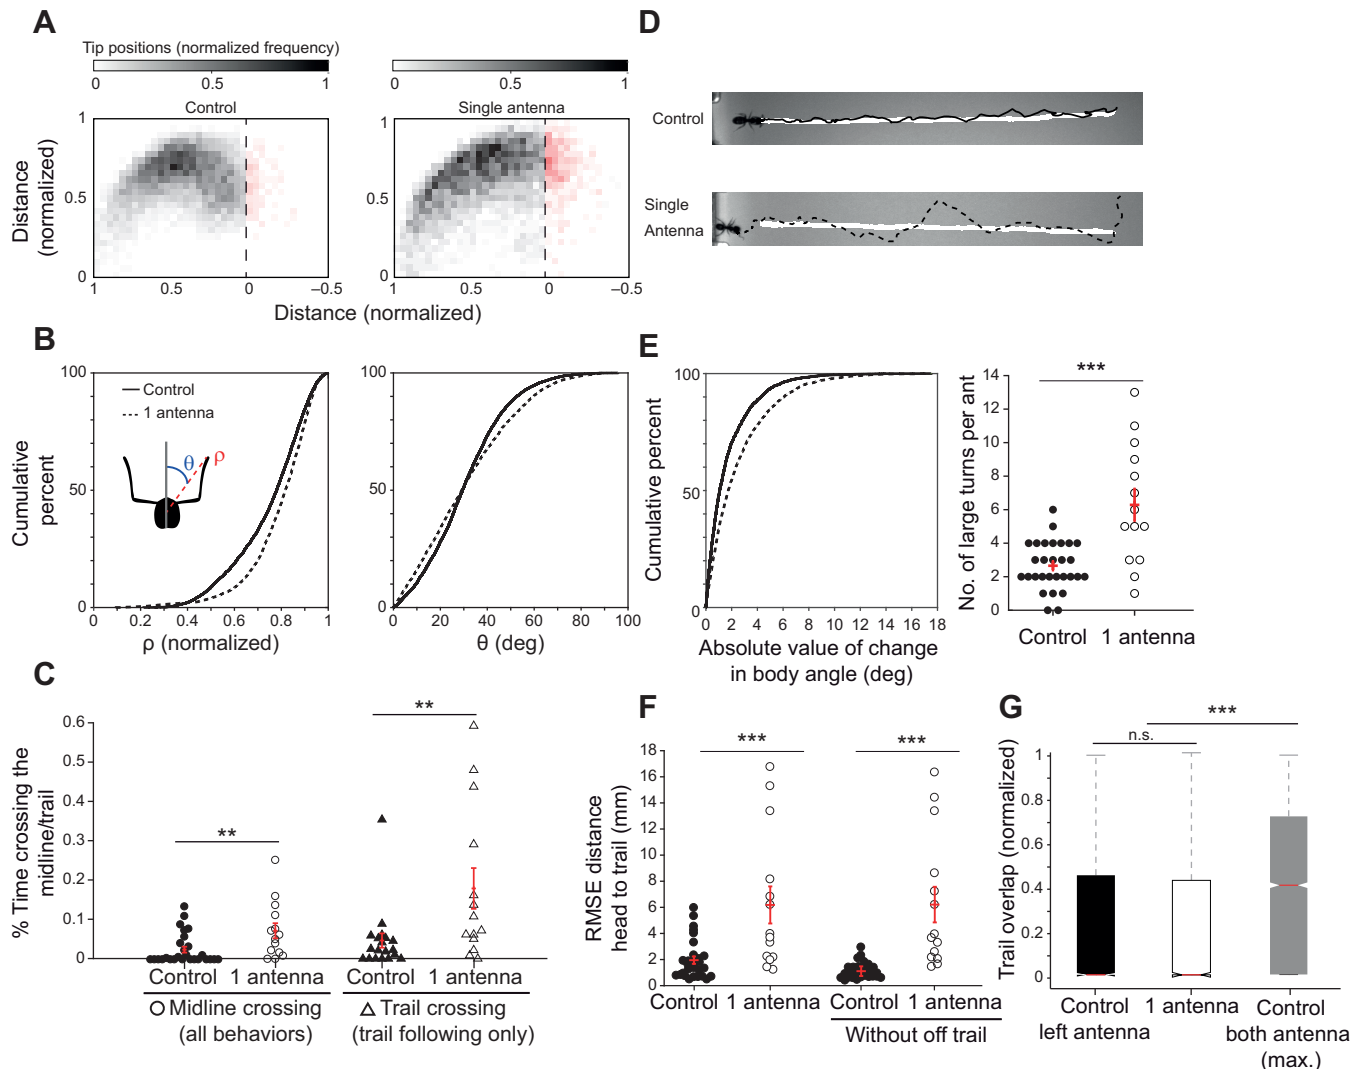

**Fig. 7. Single antenna removal results in reduced tracking accuracy and altered antenna usage.** (A) Normalized relative antenna tip positions from 29 control ants (left antenna only; 7945 data points) and 14 single antenna ants (6 ants over 14 trials; 4693 data points). Red pixels mark positions where the antenna tip crosses the body axis. (B) Cumulative percent plots for control and single-antenna ants of the distance of each antenna to the head ( $\rho$ ; left) and the angle between the body axis and a line connecting the head and the antenna point ( $\theta$ ; right). For both variables, the two distributions were statistically distinct (Kolmogorov–Smirnov, two-tailed,  $P < 0.0001$ ). (C) Left: percent of time when an ant's antenna extended to the contralateral side of the body axis for control ants ( $n = 29$ , filled circles) and single-antenna ants ( $n = 14$ , open circles). Right: percent of time during trail following when an ant's antenna extended beyond the contralateral edge of the trail for control ants ( $n = 19$ , filled triangles) and single-antenna ants ( $n = 14$ , open triangles); only ants with at least 30 frames of trail-following behavior were considered. In both cases, single-antenna ants crossed their body axis and the trail with their antenna more often than control ants (2.9-fold more and 6.8-fold more, respectively; Wilcoxon rank-sum, one-tailed,  $P < 0.01$ ). Mean and s.e.m. (red) for each group are shown. (D) Representative images plotting ant head position over time for a control (solid line) and single-antenna (dashed line) ant during trail tracking (trail pixels are in white). (E) Left: cumulative percent plots for control and single-antenna ants of the absolute value of change in body angle. The distributions were statistically distinct (Kolmogorov–Smirnov, two-tailed,  $P < 0.0001$ ). Right: comparison of the number of large turns per ant for control ( $n = 29$ ) and single-antenna ( $n = 14$ ) ants. The single-antenna ants show a higher number of turns (Wilcoxon rank-sum, one-tailed,  $P < 0.0001$ ). Mean and s.e.m. (red) for each group are shown. (F) Left: comparison of the root mean square error (RMSE) of the ant head to trail distance for control (left antenna,  $n = 29$ ) and single-antenna ( $n = 14$ ) ants. Right: the same comparison is shown with data excluding off-trail behavior from both groups. In both cases, the single-antenna ants have a higher RMSE than control ants (Wilcoxon rank-sum, one-tailed,  $P < 0.0001$ ). Mean and s.e.m. (red) for each group are shown. (G) Trail overlap for the left antenna only (control) ants, single-antenna ants and control ants (maximum of left and right antenna values per frame). The left antennae only control ants and the single-antennae ants show a similar overlap with the trail (Wilcoxon rank-sum, one-tailed,  $P = 0.685$ ), but the control ants' maximal overlap is significantly larger (Wilcoxon rank-sum, one-tailed,  $P < 0.0001$ ). \*\* $P < 0.01$ ; \*\*\* $P < 0.001$ ; n.s., not significant.

The first behavioral module, sinusoidal, was characterized by periodic movement along the odor trail. This behavior did not occur frequently in no-trail conditions (1 of 10 ants exhibited sinusoidal behavior). This type of movement has been observed in ants (Hölldobler and Wilson, 1990) as well as in a range of other species (Martin, 1965; Borst and Heisenberg, 1982; Gomez-Marín et al., 2010; Khan et al., 2012; Porter et al., 2007). It is thought to represent

a search pattern along an odor trail or gradient, where temporal odor information is used to stay centered on a signal. Although the ant head and centroid cross the trail during this behavior, the antennae do not cross the trail often. Instead, the antennae touch the trail and the ant turns away (as seen in the example plot shown in Fig. 2). Furthermore, we noted a stereotyped movement pattern when correlating changes in antennae- and body-based movement

(Fig. S4A); for example, movement of the left antenna towards the body is often followed by a turn to the right. These observations highlight sinusoidal behavior as a more stereotyped movement. In our analysis, we found that the relative antennae tip positions and movements in this behavioral module were restricted to a smaller area (when compared with probing or trail following) and were indistinguishable from antennae positioning during exploratory behavior (Fig. 3B). Therefore, odor sampling during sinusoidal behavior is accomplished by alternating movements of the ant itself along the trail while keeping its antennae outstretched. This is the only behavior where antenna movements show a significant correlation with the movements of the body (Fig. S4).

The second behavioral module, probing, described ants that were stationary and within sampling distance of the trail. During probing behavior, the ant's antennae had the largest area of sampling (Fig. 3B) and were most densely focused on the trail itself (Fig. 5A). Additionally, ants swept their antennae back and forth towards the head (Fig. 4B). These observations are consistent with an intensive sampling of odor to examine and identify its relevance. This behavioral module is not exclusive to encountering the experimenter-drawn trail; ants not given a trail would infrequently engage in a probing-like behavior as well (data not shown).

The third behavioral module, trail following, was characterized by an ant following the trail with high accuracy. The relative antennae tip distribution largely excluded an area at the midline that was approximately the width of the trail (Fig. 3A). Antennae moved in a direction perpendicular to the trail (Fig. 4B), and the short duration and extent of antennae tip–trail overlap results in a higher temporal gradient of estimated odor concentration than in probing (Fig. 5C,D). Taken together, these findings suggest this behavior involves edge detection. Evidence of edge detection during tracking has been seen in other animals such as bats and rats (Yovel et al., 2010; Khan et al., 2012).

In these three behavioral modules, the relative antennae tip positions displayed distinct spatial distributions, and as such they would gather and convey to the brain different information about trail odor (Fig. 3D). Previous studies in various species have analyzed large-scale antennal movements in response to stimuli (e.g. Huston et al., 2015; Pribbenow and Erber, 1996), but finer movements and distinct strategies are largely uncharacterized. Given the importance of understanding how sensors are moved to sample the environment and gather information to guide behavior, our models in ants provide an important basis for future studies.

### Ants use bilateral information to guide turning in trail-following behavior

Previous experimental and theoretical studies have proposed various models of tropotaxis to explain how ants track odor trails (Hangartner, 1967; Calenbuhr and Deneubourg, 1992; Couzin and Franks, 2003). In Argentine ants, behavior at trail bifurcation points could be predicted based on the estimated concentration difference between antennae (Perna et al., 2012). We tested this idea in trail-following behavior by using the distance of the trail to the antenna as a proxy for odor signal. In a linear model, we found that the direction and magnitude of the turning angle of the ant could be partially explained by the difference in trail distance between antennae (Fig. 5E). We found that larger differences in estimated odor concentrations between the two antennae led to larger turning angles towards the trail (Fig. 5E). The best model used a 133 ms (4 frame) delay between odor sensation and subsequent turns. This latency for motor implementation is similar in time scale to that for

adult *Drosophila*, which have been shown to redirect flight heading within approximately 200 ms of detecting an odor plume (van Breugel and Dickinson, 2014). These results demonstrate that ants use bilateral differences in antenna signals to track odors during trail following. We note, however, that putative antennae concentration differences can only partially predict ant movement, and many other factors are likely to be involved in motor decision making.

### Antennae have non-redundant roles in sampling odor trails

Given the strong evidence for the importance of bilateral comparisons, we asked whether each antenna within a pair is used differently during trail tracking. We looked at the correlation between antennae using their distance either to the trail or to the ant's body axis. In all behavioral modules, the antennae exhibited a strong anti-correlation (Fig. 6B). Assuming odor information is typically highly variable in time and space, keeping the two odor sensors in different locations would increase the efficiency of detecting odors and sampling odor space. As far as we know, this is the first evidence of stereotyped coordination between antennae during odor tracking. Except for trail following, these anti-correlations arise from alternating movements of the antennae with respect to the body axis. In trail following, antennae predominantly show anti-correlation with respect to the trail but not to the body axis. One possibility is that the antennae movement driving the anti-correlation with respect to the trail comes from changes in the angle of the body axis rather than movements of antennae relative to the body axis. Indeed, careful inspection of the videos shows numerous examples of the ant making small adjustments in body angle with respect to the trail (Movie 3). Thus, like sinusoidal behavior, the body movement of the ant is an important variable involved in positioning the olfactory sensors.

In addition to the anti-correlation between antennae, we found a continuum of antennae bias in trail sampling. In a large fraction of ants (15 out of 22), one antenna overlapped significantly more with the trail than the other during a tracking run (Fig. 6C). In some ants, the left antenna was strongly biased (8 of 15) and in others the right antenna was strongly biased (7 of 15), similar to studies showing a continuum of handedness in turning bias in flies (Buchanan et al., 2014). This bias was radically altered when the odor trails were curved as opposed to straight (Fig. 6E,F). When following curved trails (either to the right or the left), the bias was strongly towards the antenna ipsilateral to the inner curvature. This result could be interpreted in two ways: (1) any inherent bias in sampling (i.e. 'handedness') can be masked by trail features that impose a greater bias in antennae overlap; (2) the pattern of antennae sampling used by ants is not inherent but rather context dependent, such that ants use different sampling strategies in different situations. Regardless, the presence of a bias suggests lateral specialization within an antennae pair that affects odor sampling on simple trails. This fits with evidence from a variety of studies which has shown a lateralization of insect brains and behaviors (Buchanan et al., 2014; Wes and Bargmann, 2001; Letzkus et al., 2006; Rogers et al., 2013; Frasnelli et al., 2012).

### Single-antenna removal impairs tracking and changes in antenna sampling

Qualitative and quantitative studies have repeatedly shown that single antennectomy results in a modest decrease in odor gradient- and trail-tracking accuracy in insects (Martin, 1965; Hangartner, 1967; Borst and Heisenberg, 1982; Duistermars et al., 2009; Steck et al., 2010; cf. Lockey and Willis, 2015). Interestingly, we saw altered antennae tip sampling in ants after surgery (Fig. 7A,B). After



2–72 h, the single antenna moved over a larger area of space, including extending across the ant's midline and the contralateral edge of the trail, which is rarely seen in controls (Fig. 7A,C). This is consistent with evidence from *Drosophila* that show adaptation within days of amputation (Wosnitza et al., 2013; Isakov et al., 2016; Muijres et al., 2017), as well as recent studies on ants showing robust performance across a range of olfactory behaviors after unilateral antenna amputation (Waxman et al., 2017). We found that deviation from the trail (as measured by RMSE) was higher for single-antenna ants (Fig. 7D,F). Ants were, however, still able to track trails along their entire length (15 cm), as has been seen previously, and which is thought to be due to angle corrections after successful temporal comparisons (klinotaxis). Ants with a single antenna made fewer small instantaneous body angle changes and more large turns (Fig. 7E). This is consistent with the idea that single-antenna ants are worse at making small adjustments to stay centered on the trail (i.e. trail following), and subsequently they make large corrections after wandering far off the trail. Indeed, we saw more off-trail and less trail-following behavior in single-antenna ants compared with controls (Fig. S3C). Overall, behavioral changes in antennae movement may partially explain how the single-antenna ant is able to maintain a level of estimated odor information similar to what one antenna of a control ant receives despite greater deviation from the trail (Fig. 7G).

## Conclusion

Here, we have developed a better understanding of the multiple behavioral strategies ants use to track odor trails. These include three distinct and stereotyped patterns of body and antenna movement and usage, which affect the amount of odor information received over time by each antenna and the ant brain. These descriptions provide insight into the general strategies ants use for trail tracking as well as evidence for how the two distinct antennae move with respect to each other and relate to motor output. In future studies, behavioral analysis could be coupled to neural recordings to determine how odor inputs and proprioceptive information are transformed into motor outputs in simple, as well as more complex, odor trails.

## Acknowledgements

We thank all the members of the Murthy lab for their helpful discussions on experimental design and data analysis. We thank the members of the Traniello lab, especially Mario Muscedere and Fran Kamhi, for teaching us how to collect, house and dissect ants.

## Competing interests

The authors declare no competing or financial interests.

## Author contributions

Conceptualization: R.W.D., M.R.M., V.N.M.; Methodology: R.W.D., M.R.M., V.K., V.N.M.; Software: R.W.D., M.R.M.; Validation: R.W.D., M.R.M.; Formal analysis: R.W.D., M.R.M., V.K., V.N.M.; Investigation: R.W.D., M.R.M.; Resources: R.W.D.; Data curation: R.W.D., M.R.M.; Writing - original draft: R.W.D., M.R.M.; Writing - review & editing: R.W.D., M.R.M., V.K., V.N.M.; Visualization: R.W.D., M.R.M.; Supervision: R.W.D., V.N.M.; Project administration: R.W.D., V.N.M.; Funding acquisition: V.N.M.

## Funding

Research in the Murthy lab related to this work was supported by flexible funds from Harvard University. M.R.M. received support from the Harvard College Research Program and the Herchel Smith-Harvard Undergraduate Science Research Program.

## Data availability

All data are available from the corresponding author, Ryan W. Draft (draft@fas.harvard.edu), upon request. Software is available on Github at: <https://github.com/rwdraft/AnTipMarker>.

## Supplementary information

Supplementary information available online at <http://jeb.biologists.org/lookup/doi/10.1242/jeb.185124.supplemental>

## References

- Bhatkar, A. and Whitcomb, W. H. (1970). Artificial diet for rearing various species of ants. *Fla. Entomol.* **53**, 229–232.
- Borst, A. and Heisenberg, M. (1982). Osmotropotaxis in *Drosophila melanogaster*. *J. Comp. Physiol.* **147**, 479–484.
- Buchanan, S. M., Kain, J. S. and de Bivort, B. L. (2014). Neuronal control of locomotor handedness in *Drosophila*. *Proc. Natl. Acad. Sci. USA* **112**, 6700–6705.
- Calenbuhr, V. and Deneubourg, J.-L. (1992). A model for osmotropotactic orientation (I). *J. Theor. Biol.* **158**, 359–393.
- Couzin, I. D. and Franks, N. R. (2003). Self-organized lane formation and optimized traffic flow in army ants. *Proc. R. Soc. Lond. B.* **270**, 139–146.
- Czaczkas, T. J. and Heinze, J. (2015). Ants adjust their pheromone deposition to a changing environment and their probability of making errors. *Proc. R. Soc. B.* **282**, 1810–1816.
- Czaczkas, T. J., Grüter, C. and Ratnieks, F. L. W. (2015). Trail pheromones: an integrative view of their role in social insect colony organization. *Annu. Rev. Entomol.* **60**, 581–599.
- Duistermars, B. J., Chow, D. M. and Frye, M. A. (2009). Flies require bilateral sensory input to track odor gradients in flight. *Curr. Biol.* **19**, 1301–1307.
- Fonio, E., Heyman, Y., Boczkowski, L., Gelblum, A., Kosowski, A., Korman, A. and Feinerman, O. (2016). A locally-blazed ant trail achieves efficient collective navigation despite limited information. *eLife* **5**:e20185.
- Frasnelli, E., Iakovlev, I. and Reznikova, Z. (2012). Asymmetry in antennal contacts during trophallaxis in ants. *Behav. Brain Res.* **232**, 7–12.
- Gomez-Marín, A., Duistermars, B. J., Frye, M. A. and Louis, M. (2010). Mechanisms of odor-tracking: multiple sensors for enhanced perception and behavior. *Front. Cell. Neurosci.* **4**, 1–15.
- Gomez-Marín, A., Stephens, G. J. and Louis, M. (2011). Active sampling and decision making in *Drosophila* chemotaxis. *Front. Cell. Neurosci. Nat. Commun.* **2**, 1–10.
- Graham, P. and Philippides, A. (2017). Vision for navigation: what can we learn from ants? *Arthropod. Struct. Dev.* **46**, 718–722.
- Greene, M. J. and Gordon, D. M. (2003). Social insects: cuticular hydrocarbons inform task decisions. *Nature* **423**, 32.
- Green, C. H., Burnet, B. and Connolly, K. J. (1983). Organization and patterns of inter- and intraspecific variation in the behaviour of *Drosophila* larvae. *Anim. Behav.* **31**, 282–291.
- Hangartner, W. (1967). Spezifität und Inaktivierung des Spurpheromons von *Lasius fuliginosus* Latr. und Orientierung der Arbeiterinnen im Duftfeld. *Zeitschrift für vergleichende Physiologie* **57**, 103–136.
- Hölldobler, B. and Wilson, E. O. (1990). *The Ants*. Berlin: Springer.
- Huston, S. J., Stopfer, M., Cassenaer, S., Aldworth, Z. N. and Laurent, G. (2015). Neural encoding of odor during active sampling and in turbulent plumes. *Neuron* **88**, 403–418.
- Isakov, A., Buchanan, S. M., Sullivan, B., Ramachandran, A., Chapman, J. K. S., Lu, E. S., Mahadevan, L. and de Bivort, B. (2016). Recovery of locomotion after injury in *Drosophila melanogaster* depends on proprioception. *J. Exp. Biol.* **219**, 1760–1771.
- Jackson, D. E., Holcombe, M., Ratnieks, F. L. (2004). Trail geometry gives polarity to ant foraging networks. *Nature* **432**, 907–909.
- Khan, A. G., Sarangi, M. and Bhalla, U. S. (2012). Rats track odour trails accurately using a multi-layered strategy with near-optimal sampling. *Nat. Commun.* **3**, 1–10.
- Klotz, J. H. and Reid, B. L. (1991). The use of spatial cues for structural guideline orientation in *Tapinoma sessile* and *Camponotus pennsylvanicus* (Hymenoptera: Formicidae). *J. Insect Behav.* **5**, 71–82.
- Knaden, M. and Graham, P. (2016). The sensory ecology of ant navigation: from natural environments to neural mechanisms. *Annu. Rev. Entomol.* **61**, 63–76.
- Letzkus, P., Ribi, W. A., Wood, J. T., Zhu, H., Zhang, S.-W. and Srinivasan, M. V. (2006). *Curr. Biol.* **16**, 1471–1476.
- Lockey, J. K. and Willis, M. A. (2015). One antenna, two antennae, big antennae, small: total antennae length, not bilateral symmetry, predicts odor-tracking performance in the American cockroach *Periplaneta americana*. *J. Exp. Biol.* **218**, 2156–2165.
- Martin, H. (1965). Osmotropotaxis in the honey-bee. *Nature* **208**, 59–63.
- Mathis, A., Mamidanna, P., Cury, K. M., Abe, T., Murthy, V. N., Mathis, M. W., Bethge, M. (2018). DeepLabCut: markerless pose estimation of user-defined body parts with deep learning. *Nature Neuroscience* **21**, 1281–1289.
- Morgan, D. E. (2009). Trail pheromones of ants. *Physiol. Entomol.* **34**, 1–17.
- Muijres, F. T., Iwasaki, N. A., Elzinga, M. J. and Dickinson, M. H. (2017). Flies compensate for unilateral wing damage through modular adjustments of wing and body. *Interface Focus* **7**, 1–12.
- Nakanishi, A., Nishino, H., Watanabe, H., Yokohari, F. and Nishikawa, M. (2009). Sex-specific antennal sensory system in the ant *Camponotus japonicus*: structure and distribution of sensilla on the flagellum. *Cell Tissue Res.* **338**, 79–97.



- Narendra, A., Kamhi, J. F. and Ogawa, Y.** (2017). Moving in dim light: behavioral and visual adaptations in nocturnal ants. *Integr. Comp. Biol.* **57**, 1104-1116.
- Perna, A., Granovskiy, B., Garnier, S., Nicolis, S. C., Labédan, M., Theraulaz, G., Fourcassié, V. and Sumpter, D. J. T.** (2012). Individual rules for trail pattern formation in argentine ants (*Linepithema humile*). *PLoS Comput. Biol.* **8**, 1-12.
- Porter, J., Craven, B., Khan, R. M., Chang, S.-J., Kang, I., Judkewitz, B., Volpe, J., Settles, G. and Sobel, N.** (2007). Mechanisms of scent-tracking in humans. *Nat. Neurosci.* **10**, 27-29.
- Pribbenow, B. and Erber, J.** (1996). Modulation of antennal scanning in the honeybee by sucrose stimuli, serotonin, and octopamine: behavior and electrophysiology. *Neurobiol. Learn. Mem.* **66**, 109-120.
- Reid, C. R., Sumpter, D. J. T. and Beekman, M.** (2010). Optimisation in a natural system: argentine ants solve the towers of hanoi. *J. Exp. Biol.* **214**, 50-58.
- Riffell, J. A., Shlizerman, E., Sanders, E., Abrell, L., Medina, B., Hinterwirth, A. J. and Kutz, J. N.** (2014). Sensory biology. Flower discrimination by pollinators in a dynamic chemical environment. *Science* **344**, 1515-1518.
- Rogers, L. J., Rigosi, E., Frasnelli, E. and Vallortigara, G.** (2013). A right antenna for social behaviour in honeybees. *Sci. Rep.* **3**, 1-4.
- Schneider, C. A., Rasband, W. S. and Eliceiri, K. W.** (2012). NIH Image to ImageJ: 25 years of image analysis. *Nat. Methods* **9**, 671-675.
- Schone, H. and Strausfeld, C.** (1984). *Spatial Orientation: the Spatial Control of Behavior in Animals and Man*. Princeton University Press.
- Seidl, T. and Wehner, R.** (2006). Visual and tactile learning of ground structures in desert ants. *J. Exp. Biol.* **209**, 3336-3344.
- Steck, K.** (2012). Just follow your nose: homing by olfactory cues in ants. *Curr. Opin. Neurobiol.* **22**, 231-235.
- Steck, K., Knaden, M. and Hansson, B. S.** (2010). Do desert ants smell the scenery in stereo? *Anim. Behav.* **79**, 939-945.
- Steck, K., Hansson, B. S. and Knaden, M.** (2011). Desert ants benefit from combining visual and olfactory landmarks. *J. Exp. Biol.* **214**, 1307-1312.
- Traniello, J. F. A.** (1977). Recruitment behavior, orientation, and the organization of foraging in the carpenter ant *Camponotus pennsylvanicus* degeer (Hymenoptera: Formicidae). *Behav. Ecol. Sociobiol.* **2**, 61-79.
- Van Breugel, F. and Dickinson, M. H.** (2014). Plume-tracking behavior of flying drosophila emerges from a set of distinct sensory-motor reflexes. *Curr. Biol.* **24**, 274-286.
- Waxman, H. K., Muscedere, M. L. and Traniello, J. F. A.** (2017). Behavioral performance and neural systems are robust to sensory injury in workers of the ant *Pheidole dentata*. *Brain Behav. Evol.* **89**, 195-208.
- Wes, P. D. and Bargmann, C. I.** (2001). *C.elegans* odour discrimination requires asymmetric diversity in olfactory neurons. *Nature* **410**, 698-701.
- Wosnitza, A., Bockemühl, T., Dübber, M., Scholz, H. and Büschges, A.** (2013). Inter-leg coordination in the control of walking speed in *Drosophila*. *J. Exp. Biol.* **216**, 480-491.
- Yovel, Y., Falk, B., Moss, C. F. and Ulanovsky, N.** (2010). Optimal localization by pointing off axis. *Science* **327**, 701-704.
